# Supplementary material for: Primacy Effect of Dynamic Multi-Sensory Covid ADV Influences Cognitive and Emotional EEG Responses
Source: MDPI journal article supplement (doi:10.3390/brainsci13050785), 2023-05-11
Supplement: s1 [file s1]

**Table S1.** Descriptive data related to the significant electroencephalographic results for alpha, beta, theta, and delta frequency bands (Mean  $\pm$  Standard Deviation)

| Frequency bands   | Order          | ROI               | Covid-19         | Non-Covid-19     |
|-------------------|----------------|-------------------|------------------|------------------|
| <i>Alpha band</i> | <i>Order 1</i> | Frontopolar       | 1.27 $\pm$ 0.23  | 1.30 $\pm$ 0.26  |
|                   |                | Frontal           | 3.11 $\pm$ 1.47  | 1.09 $\pm$ 2.82  |
|                   |                | Tempo-central     | 2.00 $\pm$ 0.52  | 2.07 $\pm$ 0.76  |
|                   |                | Parieto-occipital | 2.75 $\pm$ 0.82  | 3.87 $\pm$ 0.87  |
|                   | <i>Order 2</i> | Frontopolar       | 1.51 $\pm$ 0.22  | 1.68 $\pm$ 0.25  |
|                   |                | Frontal           | 1.13 $\pm$ 1.40  | 1.41 $\pm$ 0.27  |
|                   |                | Tempo-central     | 1.88 $\pm$ 0.49  | 3.60 $\pm$ 0.72  |
|                   |                | Parieto-occipital | 4.07 $\pm$ 0.78  | 4.45 $\pm$ 0.82  |
| <i>Beta band</i>  | <i>Order 1</i> | Frontopolar       | 0.78 $\pm$ 0.34  | 1.04 $\pm$ 0.36  |
|                   |                | Frontal           | 3.78 $\pm$ 2.04  | 1.04 $\pm$ 0.39  |
|                   |                | Tempo-central     | 1.05 $\pm$ 0.35  | 1.18 $\pm$ 0.61  |
|                   |                | Parieto-occipital | 0.80 $\pm$ 0.14  | 1.98 $\pm$ 0.52  |
|                   | <i>Order 2</i> | Frontopolar       | 1.01 $\pm$ 0.30  | 1.01 $\pm$ 0.32  |
|                   |                | Frontal           | 0.99 $\pm$ 1.83  | 0.92 $\pm$ 0.34  |
|                   |                | Tempo-central     | 0.80 $\pm$ 0.31  | 2.28 $\pm$ 0.54  |
|                   |                | Parieto-occipital | 1.13 $\pm$ 0.12  | 1.34 $\pm$ 0.46  |
| <i>Theta band</i> | <i>Order 1</i> | Frontopolar       | 3.21 $\pm$ 0.49  | 2.94 $\pm$ 0.49  |
|                   |                | Frontal           | 1.79 $\pm$ 4.84  | 2.04 $\pm$ 0.55  |
|                   |                | Tempo-central     | 2.21 $\pm$ 0.99  | 2.35 $\pm$ 1.27  |
|                   |                | Parieto-occipital | 5.17 $\pm$ 0.55  | 5.92 $\pm$ 0.91  |
|                   | <i>Order 2</i> | Frontopolar       | 3.36 $\pm$ 0.44  | 3.29 $\pm$ 0.44  |
|                   |                | Frontal           | 7.91 $\pm$ 4.33  | 2.88 $\pm$ 0.49  |
|                   |                | Tempo-central     | 3.19 $\pm$ 0.89  | 6.12 $\pm$ 1.14  |
|                   |                | Parieto-occipital | 3.99 $\pm$ 0.49  | 5.07 $\pm$ 0.82  |
| <i>Delta band</i> | <i>Order 1</i> | Frontopolar       | 15.40 $\pm$ 3.19 | 14.39 $\pm$ 3.70 |
|                   |                | Frontal           | 8.33 $\pm$ 1.55  | 9.48 $\pm$ 2.52  |
|                   |                | Tempo-central     | 9.97 $\pm$ 1.54  | 8.29 $\pm$ 3.43  |
|                   |                | Parieto-occipital | 15.73 $\pm$ 1.95 | 16.05 $\pm$ 4.45 |
|                   | <i>Order 2</i> | Frontopolar       | 21.50 $\pm$ 2.85 | 23.23 $\pm$ 3.31 |
|                   |                | Frontal           | 10.20 $\pm$ 1.38 | 11.96 $\pm$ 2.25 |
|                   |                | Tempo-central     | 6.51 $\pm$ 1.38  | 12.00 $\pm$ 3.07 |
|                   |                | Parieto-occipital | 12.82 $\pm$ 1.74 | 18.60 $\pm$ 3.98 |
